# Supplementary material
Source: PubMed Central journal article supplement (PMC3011867)
Supplement: NIHMS118430-supplement-1.pdf [file NIHMS118430-supplement-1.pdf]

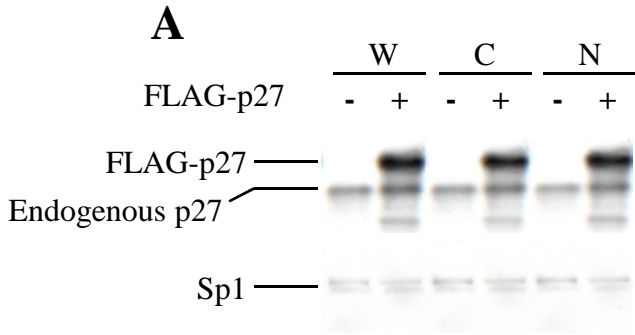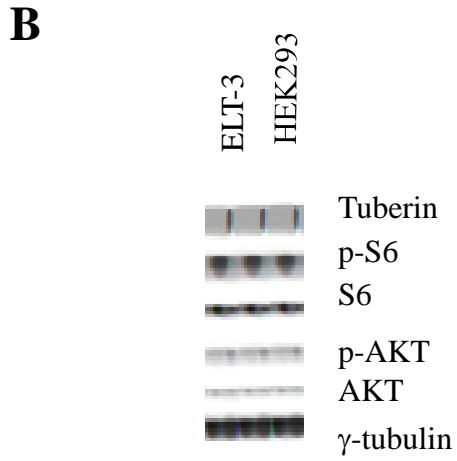

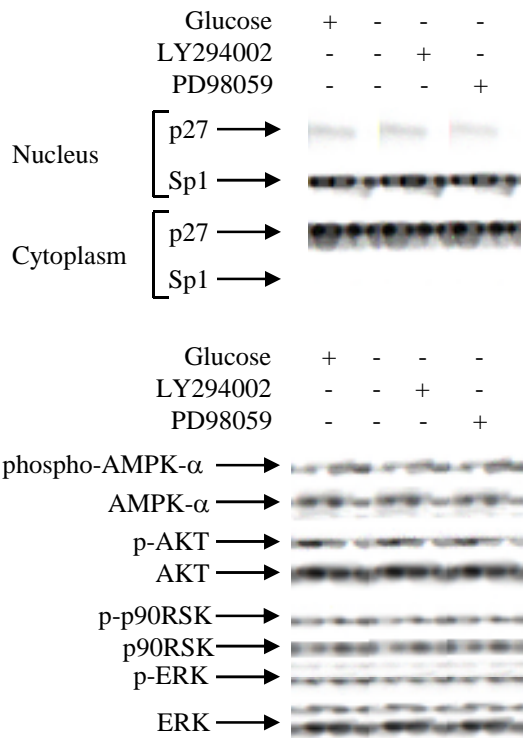

**Table 1. Kidney tumors in Tsc2<sup>+/-</sup> compound heterozygous mice**

| p27 genotype                         | p27 <sup>+/+</sup> | p27 <sup>+/-</sup> | p27 <sup>-/-</sup> |
|--------------------------------------|--------------------|--------------------|--------------------|
| N                                    | 10                 | 21                 | 10                 |
| Tumor multiplicity<br>(mean+/- S.D.) | 2.5+/-5.5          | 1.6+/-2.2          | 3.6+/-2.5          |
| p value (t test)                     |                    | 0.7                | 0.6                |
| Tumor incidence                      | 5/10=50%           | 14/21=66%          | 8/10=80%           |
| p-value ( $\chi^2$ )                 |                    | 0.4                | 0.3                |
